# Supplementary material
Source: PubMed Central journal article supplement (PMC4214157)
Supplement: NIHMS637075-supplement-Figures.pdf [file NIHMS637075-supplement-Figures.pdf]

Supplementary Information for “Binding Structures of  
tri-N-acetyl- $\beta$ -glucosamine in Hen Egg White Lysozyme using Molecular  
Dynamics with a Polarizable Force Field”

Yang Zhong and Sandeep Patel\*

*Department of Chemistry and Biochemistry,*

*University of Delaware, Newark, Delaware 19716, USA*

---

\*Corresponding author. E-mail: sapatel@udel.edu

## List of Tables

|     |                                                                                                                                     |   |
|-----|-------------------------------------------------------------------------------------------------------------------------------------|---|
| I   | Electrostatic Parameters in the polarizable CHEQ Force Fields (Part I) . . . . .                                                    | 3 |
| II  | Electrostatic Parameters in the polarizable CHEQ Force Fields (Part II) . . . . .                                                   | 4 |
| III | Nonbond Parameters for the CHEQ and PHLB Force Fields . . . . .                                                                     | 5 |
| IV  | Small Molecule GB Energies Using C22 and CHEQ Charges. . . . .                                                                      | 6 |
| V   | Fitting Constants for Entropy Extrapolation. The numbers in the brackets represent asymptotic standard errors upon fitting. . . . . | 7 |

| Atom Name | Atom Type | $\chi^a$ | $(\eta_i^o)^a/2$ |
|-----------|-----------|----------|------------------|
| C1        | CTS       | 310      | 98               |
| H1        | HAS       | 295      | 251              |
| O1        | OHS       | 515      | 154              |
| HO1       | HOS       | 88       | 259              |
| C2        | CTS       | 310      | 98               |
| H2        | HAS       | 268      | 251              |
| C5        | CTS       | 290      | 98               |
| H5        | HAS       | 268      | 251              |
| O5        | OES       | 500      | 154              |
| NT        | NG1       | 557      | 149              |
| HNT       | HG        | 99       | 297              |
| C7        | CG        | 216      | 123              |
| O7        | OG        | 626      | 190              |
| C8        | CT3G      | 470      | 120              |
| H81       | HA3G      | 271      | 251              |
| H82       | HA3G      | 271      | 251              |
| H83       | HA3G      | 271      | 251              |

<sup>a</sup> Electronegativity  $\chi$  and atomic hardness  $\eta$  are in units of  $\frac{kcal/mol}{e}$  and  $\frac{kcal/mol}{e^2}$ , respectively. The values for  $\eta$  correspond identically to  $J_{ii}$  in the text discussion.

TABLE I:

| Atom Name | Atom Type | $\chi^a$ | $(\eta_i^o)^a/2$ |
|-----------|-----------|----------|------------------|
| C3        | CTS       | 310      | 98               |
| H3        | HAS       | 268      | 251              |
| O3        | OHS       | 550      | 154              |
| HO3       | HOS       | 86       | 259              |
| C4        | CTS       | 380      | 98               |
| H4        | HAS       | 268      | 251              |
| O4        | OHS       | 550      | 154              |
| HO4       | HOS       | 86       | 259              |
| C6        | CTS       | 320      | 104              |
| H61       | HAS       | 305      | 251              |
| H62       | HAS       | 305      | 251              |
| O6        | OHS       | 540      | 154              |
| HO6       | HOS       | 98       | 259              |

<sup>a</sup> Electronegativity  $\chi$  and atomic hardness  $\eta$  are in units of  $\frac{kcal/mol}{e}$  and  $\frac{kcal/mol}{e^2}$ , respectively. The values for  $\eta$  correspond identically to  $J_{ii}$  in the text discussion.

TABLE II:

| Atom Type | $\epsilon$ (CHEQ) | $R_{min}/2$ (CHEQ) | $\epsilon$ (PHLB) | $R_{min}/2$ (PHLB) |
|-----------|-------------------|--------------------|-------------------|--------------------|
| Unit      | (kcal/mol)        | (Å)                | (kcal/mol)        | (Å)                |
| CTS       | 0.020             | 2.275              | 0.020             | 2.275              |
| HAS       | 0.082             | 1.320              | 0.020             | 1.320              |
| OHS       | 0.170             | 1.630              | 0.152             | 1.770              |
| HOS       | 0.016             | 0.125              | 0.046             | 0.225              |
| OES       | 0.070             | 1.803              | 0.152             | 1.770              |
| NG1       | 0.120             | 1.880              | 0.200             | 1.850              |
| HG        | 0.016             | 0.125              | 0.046             | 0.225              |
| CG        | 0.160             | 2.225              | 0.110             | 2.000              |
| OG        | 0.115             | 1.925              | 0.120             | 1.700              |
| CT3G      | 0.073             | 2.020              | 0.080             | 2.060              |
| HA3G      | 0.023             | 1.320              | 0.022             | 1.320              |
| ON2       | 0.070             | 1.803              | 0.152             | 1.770              |

TABLE III:

| Molecule          | C22    | CHEQ   |
|-------------------|--------|--------|
| Methanol          | -7.05  | -9.93  |
| Ethanol           | -7.09  | -9.58  |
| Propanol          | -7.12  | -8.48  |
| Butanol           | -7.05  | -9.56  |
| Acetamide         | -10.81 | -21.46 |
| N-Methylacetamide | -9.39  | -21.07 |
| Formamide         | -13.11 | -24.65 |
| N-Methylformamide | -13.42 | -21.24 |
| Methanethiol      | -2.01  | -6.82  |
| Ethanethiol       | -1.97  | -4.67  |
| Methylamine       | -5.43  | -6.20  |
| Ethylamine        | -3.89  | -3.23  |
| Propylamine       | -4.58  | -4.90  |
| Butane            | -1.19  | -0.41  |

TABLE IV:

| System                                 | Model | $S_\infty$ (kcal/mol/K) | $A \times 10^{-4}$ | $n$        |
|----------------------------------------|-------|-------------------------|--------------------|------------|
| (NAG) <sub>3</sub>                     | C22   | 80.01(0.19)             | 3.43(4.16)         | 1.30(0.18) |
|                                        | CHEQ  | 75.63(0.45)             | 3.43(14.85)        | 1.25(0.59) |
| Protein <sub>WT</sub>                  | C22   | 1978.67(2.91)           | 9.71(0.28)         | 0.68(0.00) |
|                                        | CHEQ  | 1868.48(34.61)          | 2.36(0.29)         | 0.48(0.02) |
| Protein <sub>W62Y</sub>                | C22   | 2030.23(16.84)          | 8.73(1.37)         | 0.66(0.03) |
|                                        | CHEQ  | 1828.14(51.22)          | 3.01(0.64)         | 0.53(0.04) |
| Complex <sub>WT</sub> <sup>ABC</sup>   | C22   | 2156.22(7.03)           | 6.19(0.39)         | 0.59(0.01) |
|                                        | CHEQ  | 1885.26(40)             | 2.94(0.08)         | 0.51(0.04) |
| Complex <sub>WT</sub> <sup>BCD</sup>   | C22   | 2122.13(10.88)          | 5.15(0.57)         | 0.57(0.02) |
|                                        | CHEQ  | 2036.60(70.33)          | 0.89(0.22)         | 0.33(0.04) |
| Complex <sub>W62Y</sub> <sup>ABC</sup> | C22   | 2060.18(9.62)           | 9.68(0.88)         | 0.67(0.01) |
|                                        | CHEQ  | 1897.44(17.73)          | 4.07(0.39)         | 0.56(0.02) |

TABLE V:

## List of Figures

|   |                                                                                                                                                                                                    |    |
|---|----------------------------------------------------------------------------------------------------------------------------------------------------------------------------------------------------|----|
| 1 | Entropy evolution with simulated number of structures. TS is in the unit of kcal/mol.                                                                                                              | 9  |
| 2 | Evolution of HEWL backbone RMSD for Helix, Sheet and Turn Structures Based on The Fixed-charge Force Field. . . . .                                                                                | 10 |
| 3 | Evolution of HEWL backbone RMSD for Helix, Sheet and Turn Structures Based on The CHEQ Force Field. . . . .                                                                                        | 11 |
| 4 | Evolution of the RMSDs for ligand residues at different sites of ABC structure obtained from simulations based on fixed charge model and polarizable model. . .                                    | 12 |
| 5 | Evolution of the RMSDs for ligand residues at different sites of BCD structure obtained from simulations based on fixed charge model and polarizable model. . .                                    | 13 |
| 6 | Electrostatic solvation free energies $\Delta G_{GB}$ for complex, protein and ligand of 15000 wildtype structures. . . . .                                                                        | 14 |
| 7 | Nonbond solvation free energies $\Delta G_{SASA}$ for complex, protein and ligand of 15000 wildtype structures. . . . .                                                                            | 15 |
| 8 | Distributions of binding free energy $\Delta G_{bind}$ , interaction energy $\Delta E_{MM}$ and solvation free energy $\Delta G_{solv}$ for wildtype structures in different RMSD regions. . . . . | 16 |



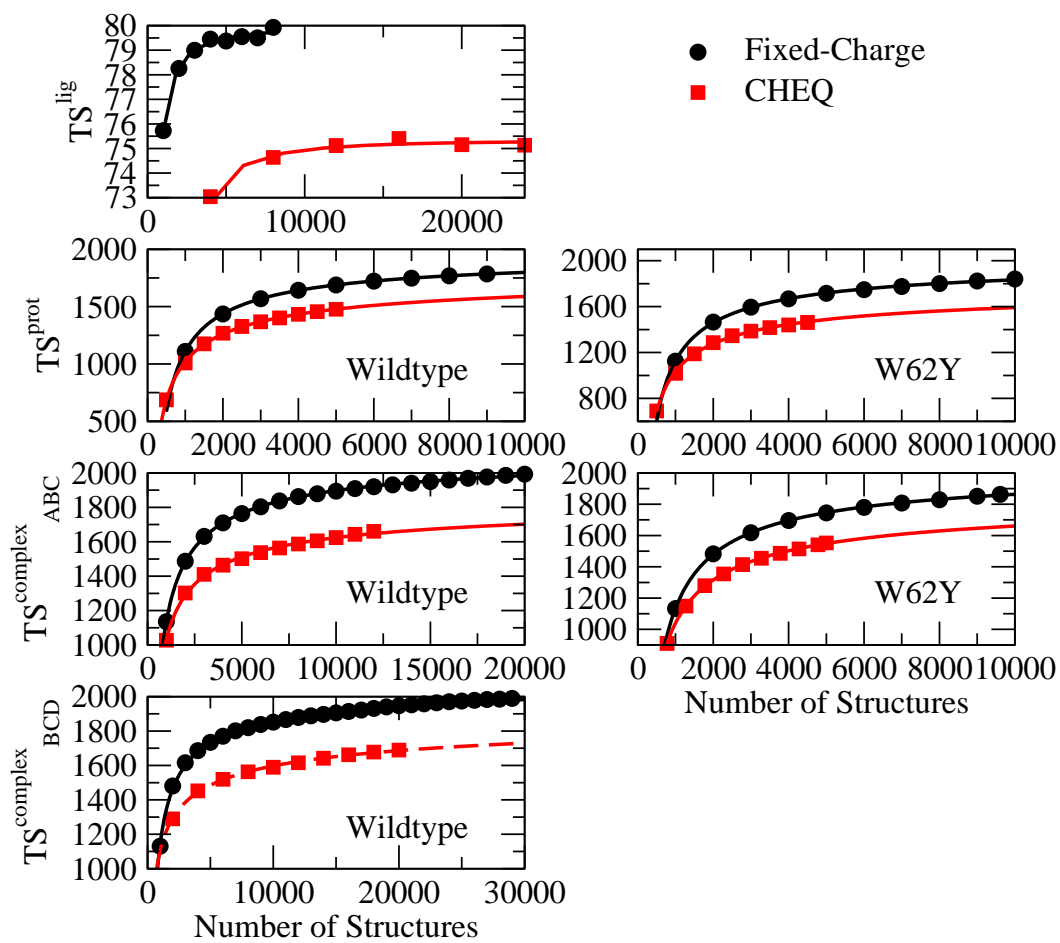

FIG. 1:

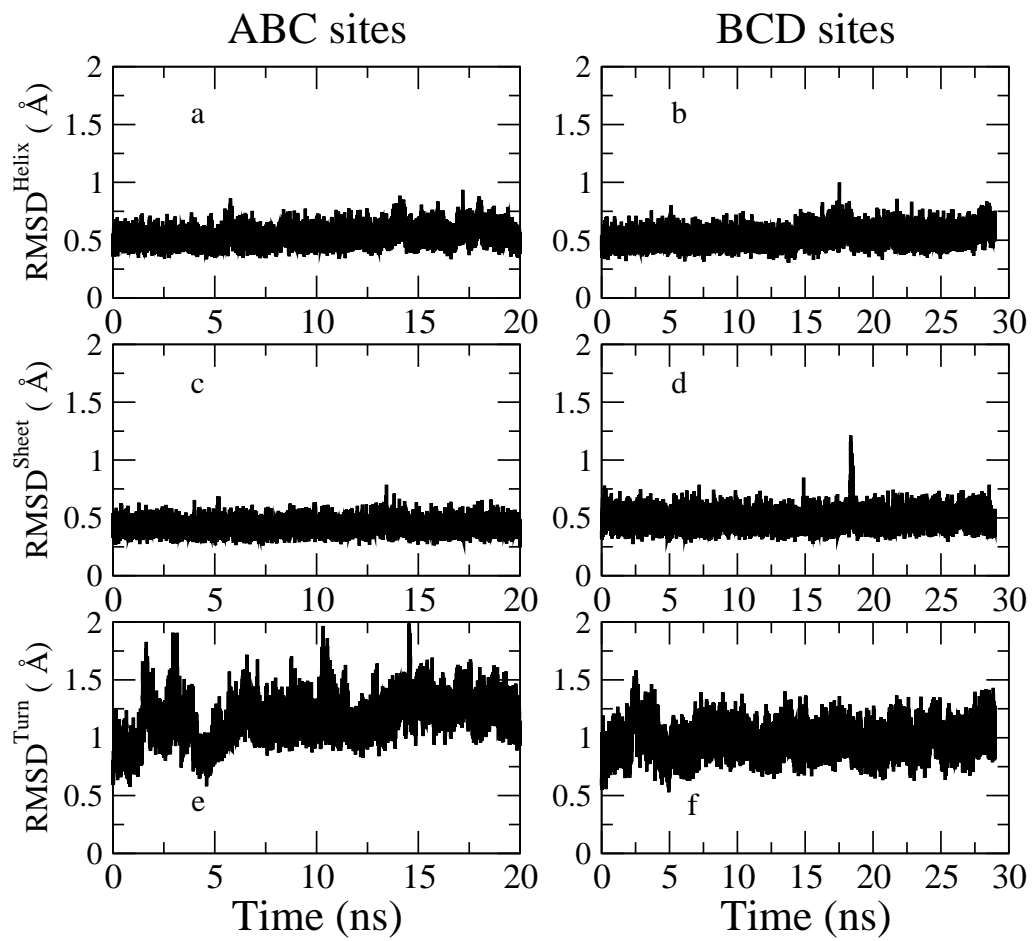

FIG. 2:

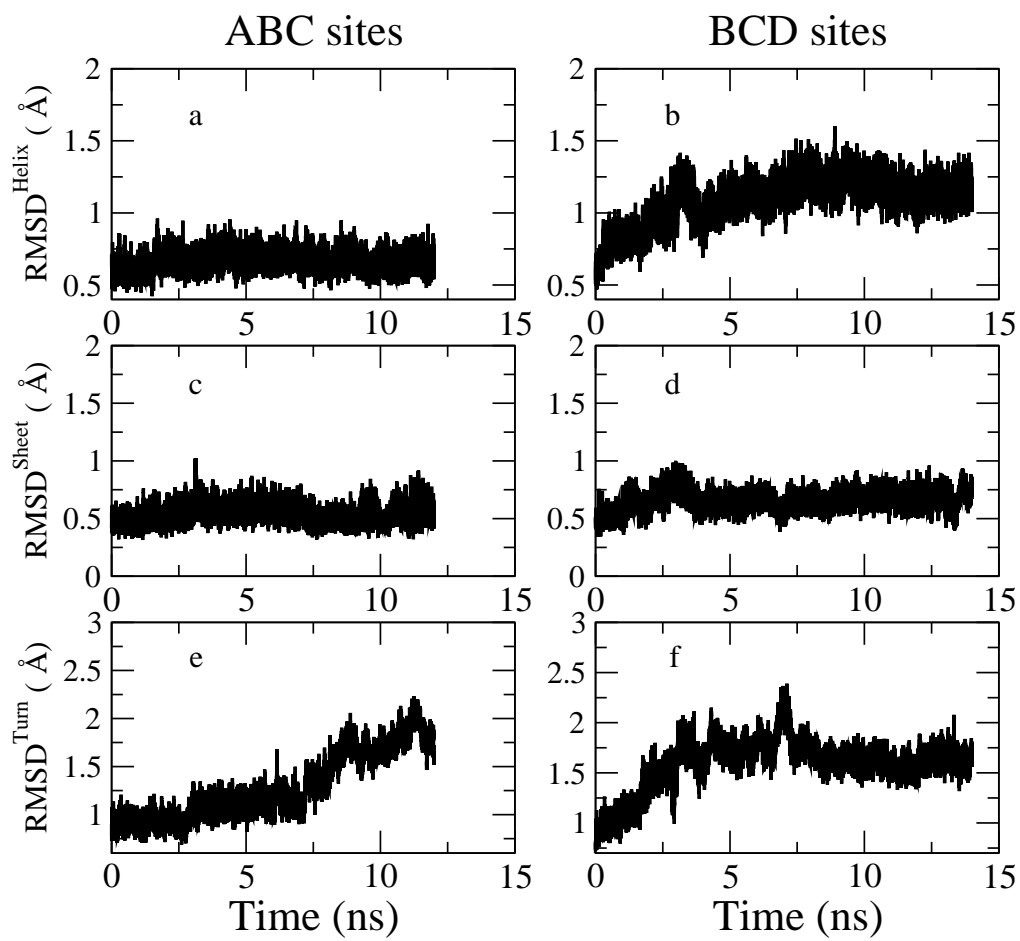

FIG. 3:

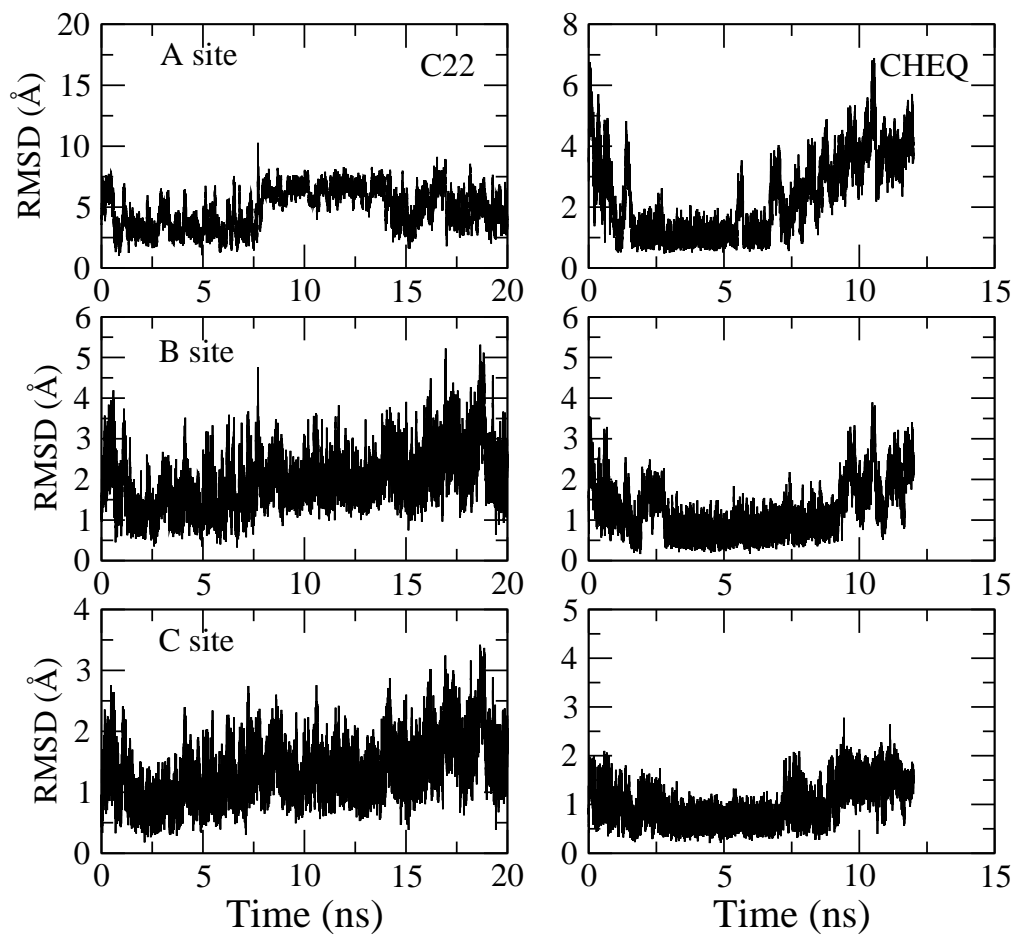

FIG. 4:

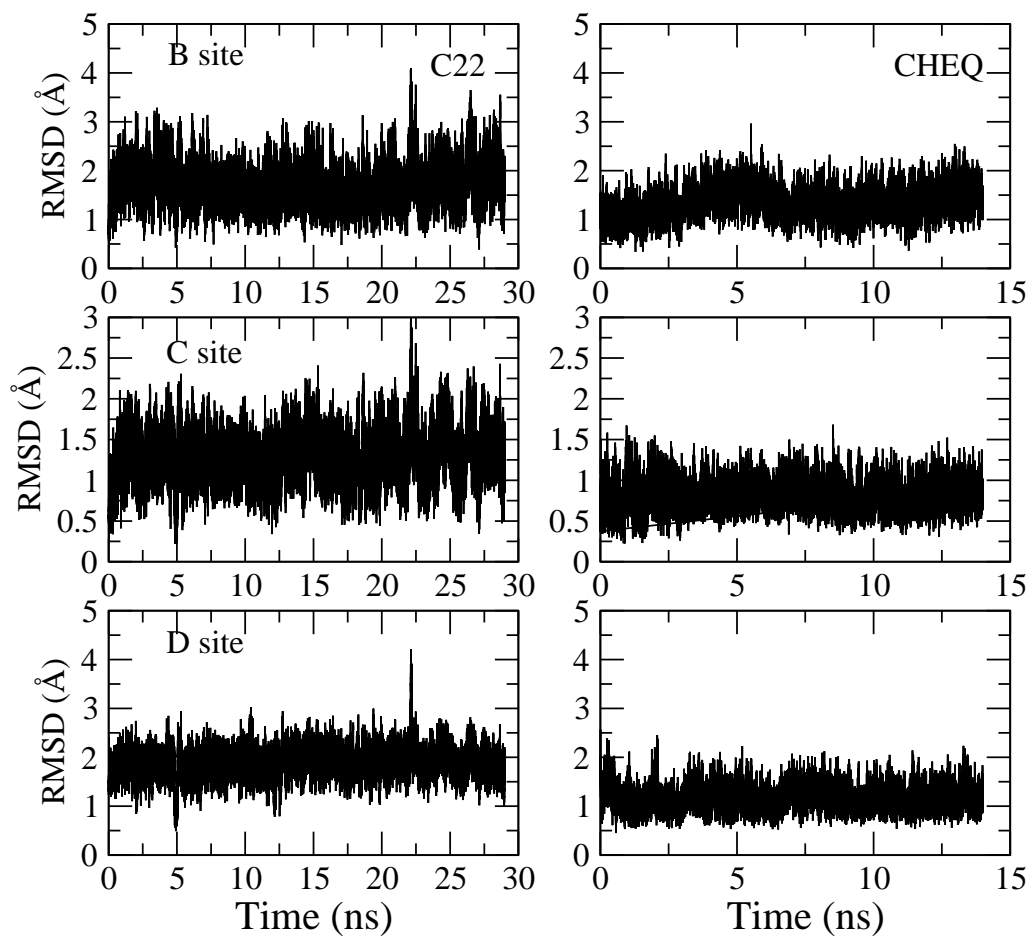

FIG. 5:

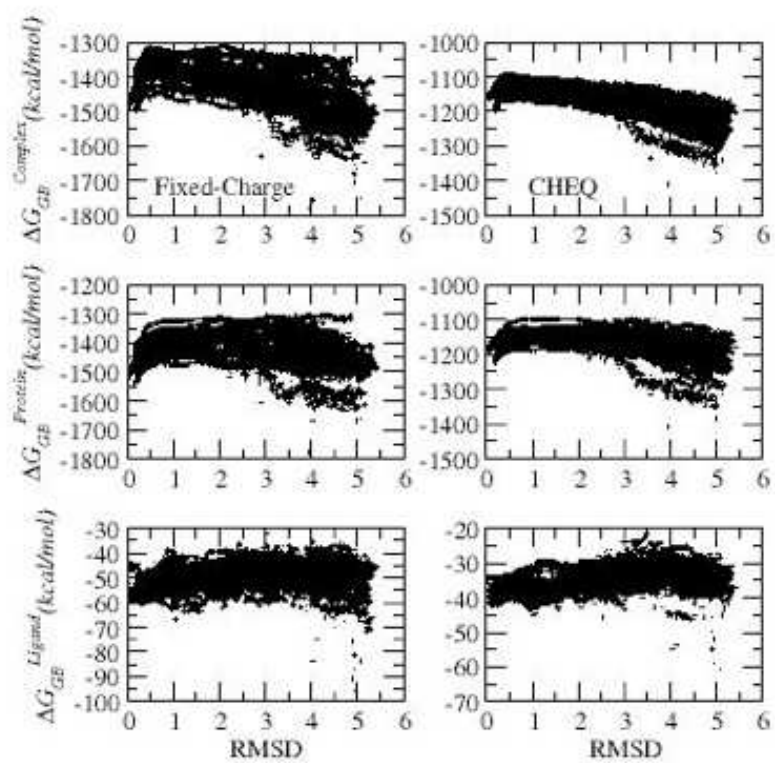

FIG. 6:

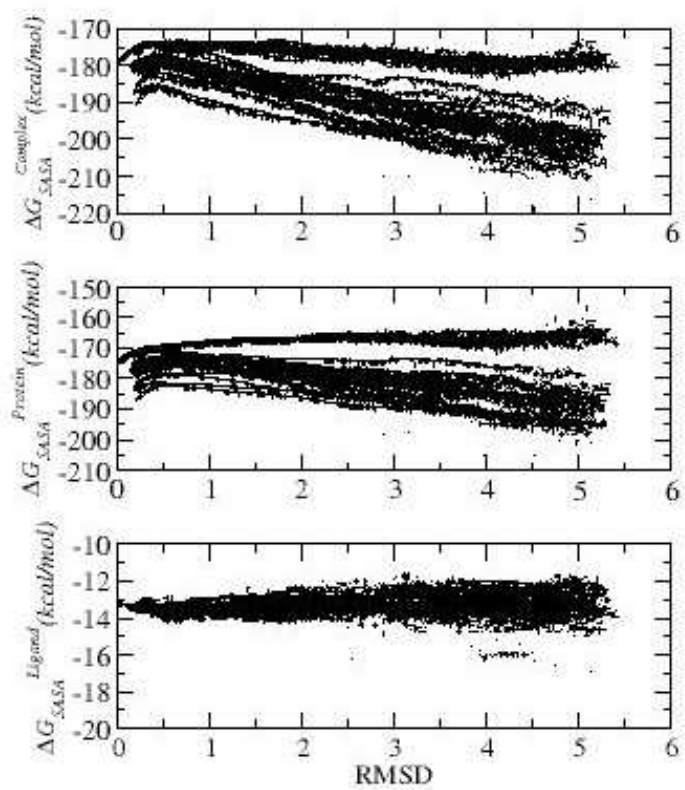

FIG. 7:

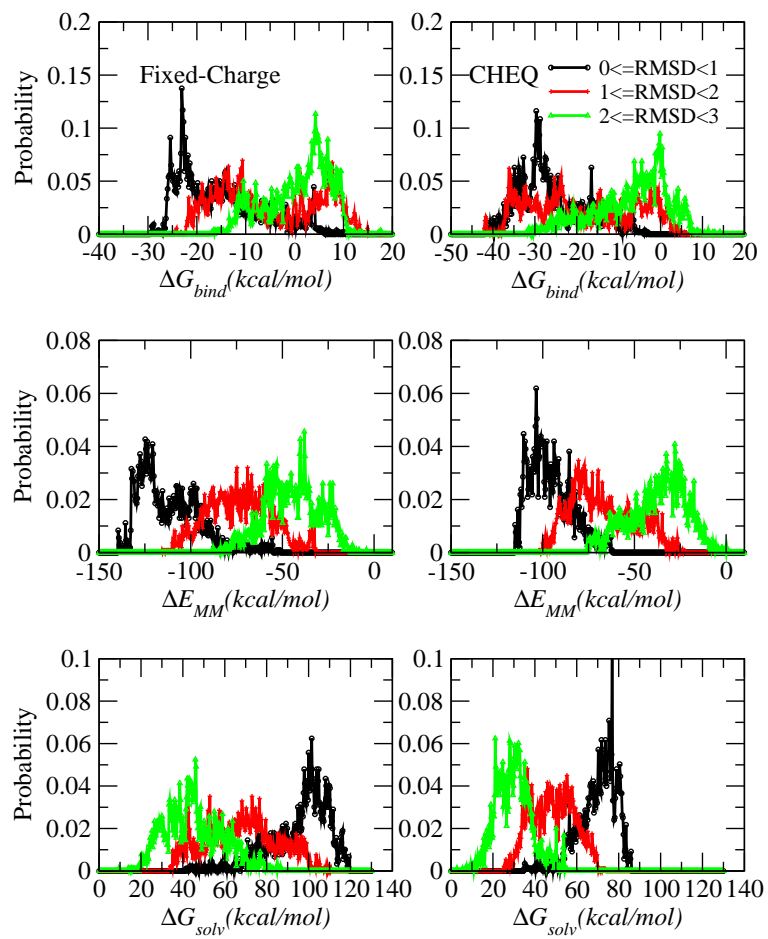

FIG. 8:
